# Supplementary material for: Heterogeneous phosphorus-doped WO3−x/nitrogen-doped carbon nanowires with high rate and long life for advanced lithium-ion capacitors
Source: Royal Society of Chemistry journal article supplement (doi:10.1039/c8ta00639c), 2018-01-01
Supplement: c8ta00639c1.pdf [file c8ta00639c1.pdf]

## Electronic Supporting Information

### Heterogeneous Phosphorus-Doped WO<sub>3-x</sub>/Nitrogen-Doped Carbon Nanowires with High-Rate and Long-Life for Advanced Lithium-Ion Capacitors

Juan Xu,<sup>a</sup> Zhenhua Liao,<sup>a</sup> Jiabao Zhang,<sup>a</sup> Biao Gao,<sup>b</sup> Paul K Chu<sup>c</sup> and Kaifu Huo<sup>a,\*</sup>

<sup>a</sup> Wuhan National Laboratory for Optoelectronics and School of Optical and Electronic Information, Huazhong University of Science and Technology, Wuhan 430074, China.

<sup>b</sup> The State Key Laboratory of Refractories and Metallurgy, Institute of Advanced Materials and Metallurgy, Wuhan University of Science and Technology, Wuhan 430081, China.

<sup>c</sup> Department of Physics and Materials Science, City University of Hong Kong, Tat Chee Avenue, Kowloon, Hong Kong, China

\*Corresponding Authors: E-mail: kfhuo@hust.edu.cn

#### Experimental section

**Preparation of heterogeneous P-WO<sub>3-x</sub>/NC nanowires.** The heterogeneous WO<sub>3</sub>/EDA nanowires were prepared by a modified hydrothermal method.<sup>21</sup> In the typical synthesis, 1 g of WO<sub>3</sub> was added to 75 ml of the EDA solution to form a uniform yellow solution, transferred to a 100 ml Teflon-lined stainless steel autoclave, and heated to 180 °C for 12 h. The as-obtained WO<sub>3</sub>/EDA nanowires

were annealed at 600 °C for 2 h in Ar to form the WO<sub>3-x</sub>/NC nanowires and further phosphorized at 300 °C for 2 h in the presence of NaH<sub>2</sub>PO<sub>2</sub>•H<sub>2</sub>O (1 g). The P-WO<sub>3-x</sub>/NC product was obtained by removing the residues in the diluted acid. For comparison, WO<sub>3</sub> nanowires were also prepared by annealing the WO<sub>3-x</sub>/NC nanowires in air at 600 °C for 2 h.

**Materials characterization.** Powder X-ray diffraction (XRD) was performed on the Philips X'Pert Pro super diffractometer (PANalytical B.V., Netherlands) with Cu K $\alpha$  radiation ( $\lambda = 1.54118 \text{ \AA}$ ). The morphology and microstructure were characterized by field-emission scanning electron microscopy (FE-SEM, FEI Nova NanoSEM 450) equipped with an X-ray energy dispersive spectrometer (EDS) as well as transmission electron microscopy (TEM, FEI Tecnai G20). The chemical bonding and bandgap information were acquired by Raman scattering (InVo-RENISHAW), Fourier transform infrared spectroscopy (FT-IR, Bruker Vertex 80 V), ultraviolet-visible diffuse reflectance spectroscopy (UV-Vis, Lambda 35), and X-ray photoelectron spectroscopy (XPS, Kratos AXIS Ultra DLD-600 W).

**Electrochemical measurement.** The electrochemical properties were determined using 2025 coin-like cells. The electrolyte was a 1 M LiPF<sub>6</sub> in a 1:1 vol/vol mixture of ethylene carbonate (EC) and diethyl carbonate (DEC). In the half-cell, a Celgard 2400 film was the separator and pure Li foil served as the counter electrode. The WO<sub>3</sub>, WO<sub>3-x</sub>/NC, and P-WO<sub>3-x</sub>/NC electrodes were prepared by mixing the active materials (80 wt.%), super-P (10 wt.%), and polyvinylidene fluoride (PVDF, 10 wt.%) in N-methyl-2-pyrrolidone (NMP) solution and coated on a copper foil serving as the current collector. After vacuum-drying at 110 °C overnight, the sample was pressed by a roll-press machine and punched into 6

mm diameter round electrodes with an MSK-T10 disc cutter at a mass loading of 1.7 mg cm<sup>-2</sup>. The AC electrodes were prepared by mixing the active materials (90 wt.%), super-P (3 wt.%) and polytetrafluoroethylene (PTFE, 7 wt.%) and pressed on the Al foil current collector. The coin-like half-cells and LICs were assembled in an Ar-filled glove box. The P-WO<sub>3-x</sub>/NC electrodes were prelithiated for three cycles at 0.1 A g<sup>-1</sup> with the Li foil as the counter electrode and then assembled with the AC cathodes for the LICs tests. The anode/cathode mass ratio was 1:5.8 according to the charge balance between the anode and cathode.

The electrochemical tests were carried out at room temperature. Cyclic voltammetry (CV) and electrical impedance spectroscopy (EIS) were carried out on the CHI 660E (Shanghai, China) and Princeton applied research (Parstat4000) in the range of 10 mHz and 10<sup>5</sup> Hz. The galvanostatic charging/discharging (GCD) measurements and cycle-life tests performed on the half-cell and LICs were carried out on the Xinwei instrument (Shenzhen, China). The specific capacitance (C, F g<sup>-1</sup>) of a LIC was calculated by Equation (1):

$$C = I / [(dV/dt)m] \approx I / [(\Delta V/\Delta t)m], \quad (1)$$

where I is constant discharge current,  $\Delta t$  is the discharging time, m represents the mass of the active materials, and  $\Delta V$  represents the working voltage after a full discharge. The energy density (E, Wh kg<sup>-1</sup>) of the LIC is calculated by Equation (2):

$$E = \int_{t_1}^{t_2} IV * dt, \quad (2)$$

where I is the discharge current density (A g<sup>-1</sup>), V is the working voltage (V), t<sub>1</sub> and t<sub>2</sub> are the starting/ending discharging time (s) of the LIC, respectively. The

power density ( $P$ ,  $W\ kg^{-1}$ ) of the LIC is determined from the energy density ( $E$ ) and discharging time ( $t$ ) according to Equation (3):

$$P = E/t \quad (3)$$

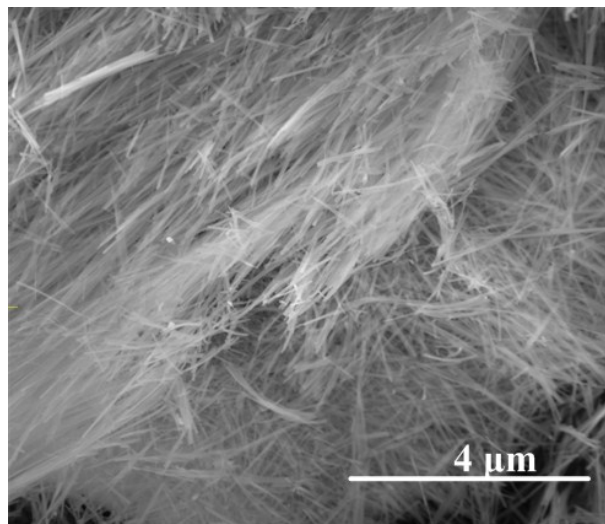

**Fig. S1.** SEM image of  $WO_3$ /EDA nanowires

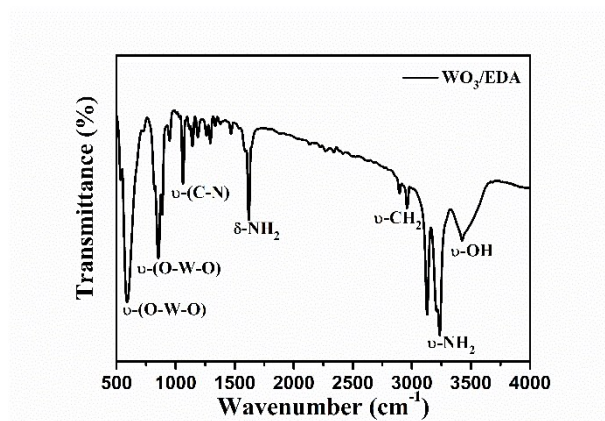

**Fig. S2.** FT-IR spectrum of organic-inorganic hybrid  $WO_3$ /EDA nanowires.

The presence of ethylenediamine (EDA) in the  $WO_3$ /EDA hybrid precursors was confirmed by the FT-IR spectra in Fig. S2, which displays  $\nu$ -OH stretching mode ( $3433\ cm^{-1}$ ),  $\nu$ -CH<sub>2</sub> bending mode ( $2960\ cm^{-1}$ ). The sharp peaks sat around  $1620\ cm^{-1}$  and  $3245\ cm^{-1}$ , corresponding to the  $\delta$ -NH<sub>2</sub> and  $\nu$ -NH<sub>2</sub> stretching modes, meaning that the interlayer organic molecules were intercalated as ammonium cations rather than neutral amines. In addition, the absorption peaks at around

590  $\text{cm}^{-1}$  and 850  $\text{cm}^{-1}$  could be attributed to the  $\nu(\text{O-W-O})$  lattice vibration modes in  $\text{WO}_3$ . These results give significant evidence for the EDA molecules intercalate into the  $\text{WO}_3$  lattice.<sup>1</sup>

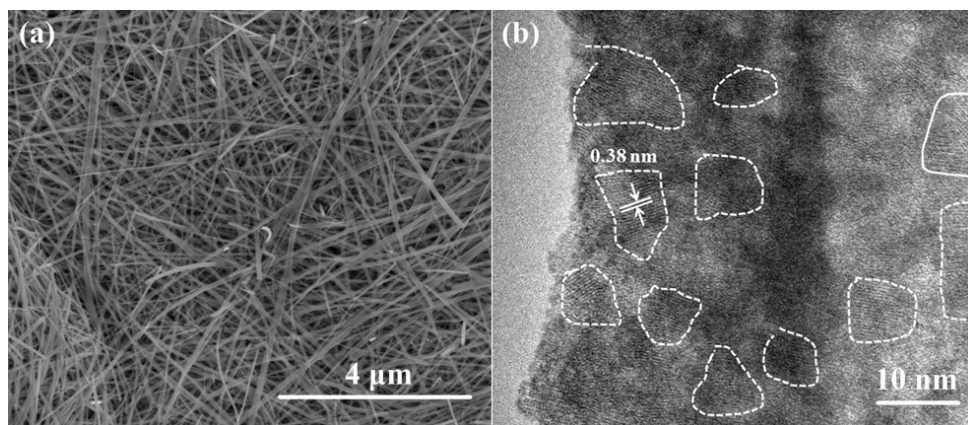

**Fig. S3.** (a, b) SEM and TEM image of the  $\text{WO}_{3-x}/\text{NC}$  nanowires.

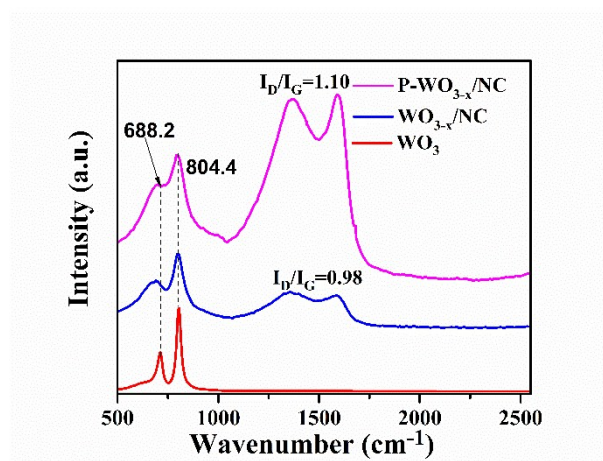

**Fig. S4.** Raman spectra of the P- $\text{WO}_{3-x}/\text{NC}$ ,  $\text{WO}_{3-x}/\text{NC}$  and  $\text{WO}_3$  nanowires.

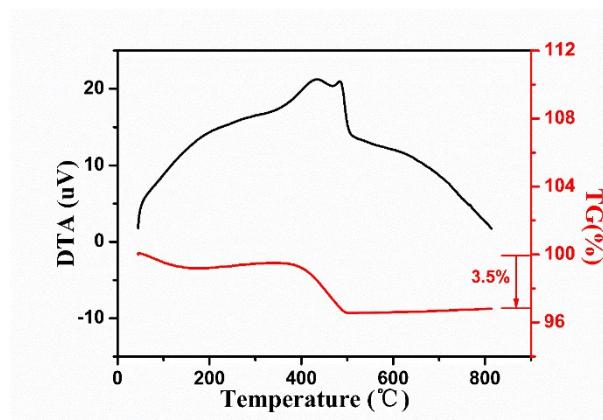

**Fig. S5.** TG-DTA curves of the  $\text{WO}_{3-x}/\text{NC}$  nanowires.

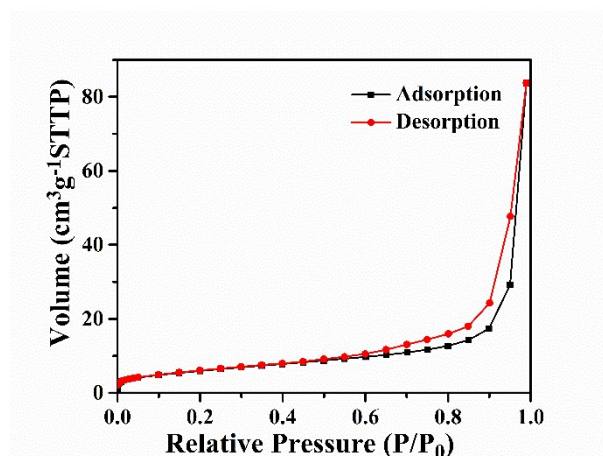

**Fig. S6.** Nitrogen adsorption/desorption isotherms of the P-WO<sub>3-x</sub>/NC nanowires electrode.

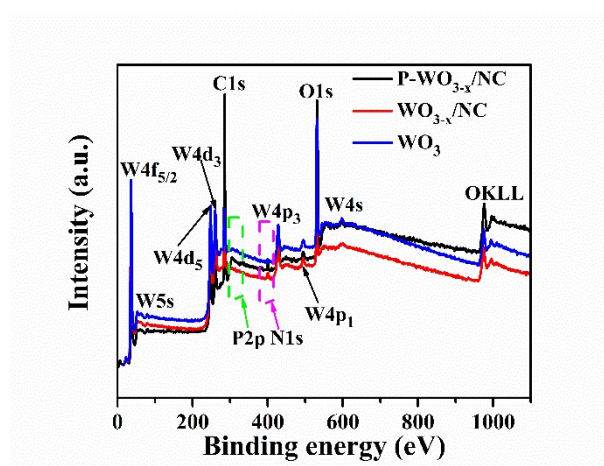

**Fig. S7.** XPS spectra of P-WO<sub>3-x</sub>/NC nanowires; WO<sub>3-x</sub>/NC nanowires and WO<sub>3</sub> nanowires.

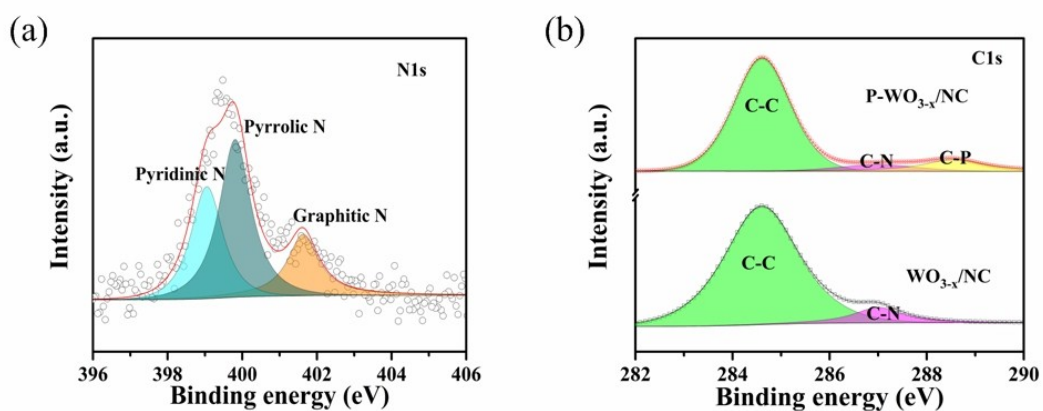

**Fig. S8.** (a) N 1s curves of P-WO<sub>3-x</sub>/NC nanowires; C1s curves in WO<sub>3-x</sub>/NC and

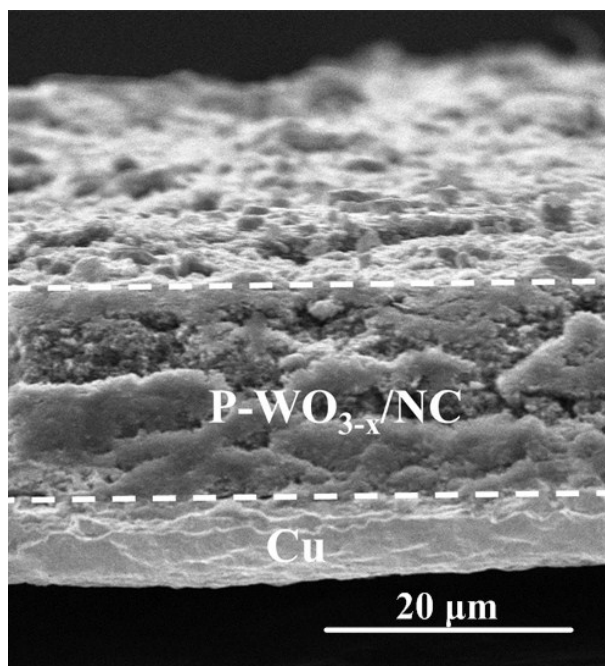

P-WO<sub>3-x</sub>/NC nanowires.

**Fig. S9.** The thickness of the P-WO<sub>3-x</sub>/NC electrodes.



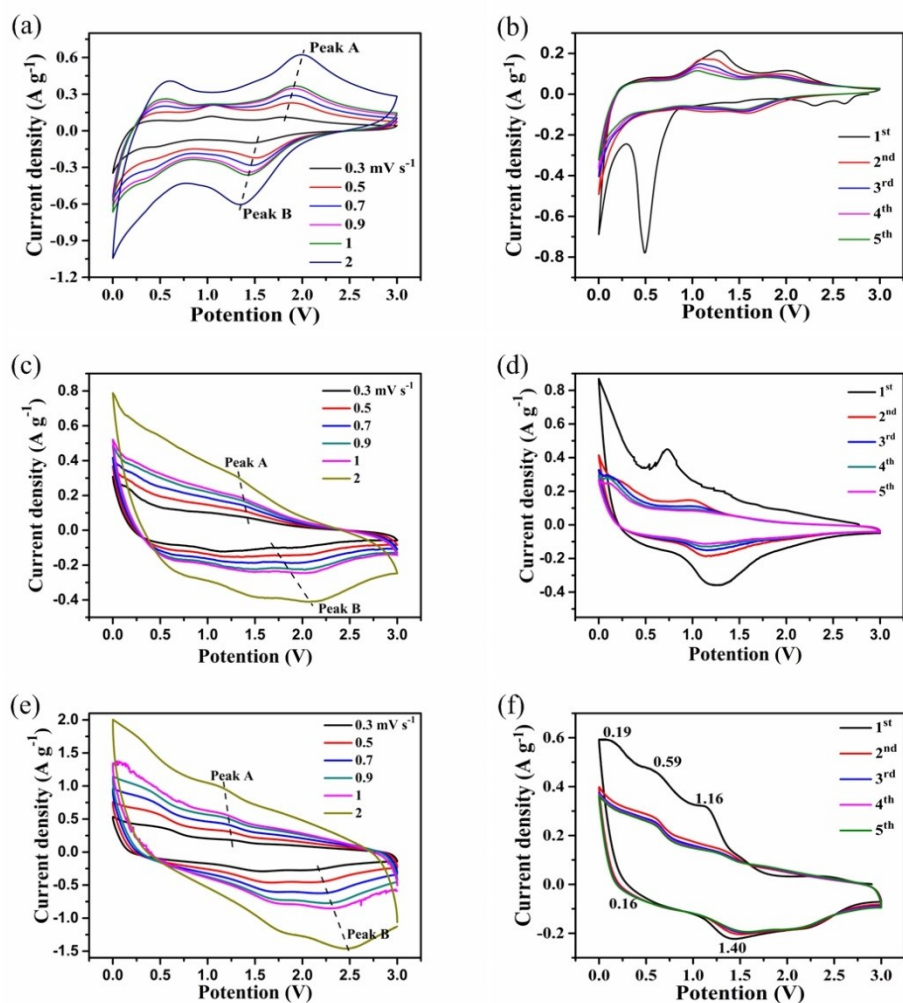

**Fig. S10.** (a, c, e) CV curves measured at various scan rates and at  $0.2 \text{ mV s}^{-1}$  for the first five cycles of  $\text{WO}_3$ ,  $\text{WO}_{3-x}/\text{NC}$  and  $\text{P-WO}_{3-x}/\text{NC}$  nanowires electrodes, respectively.

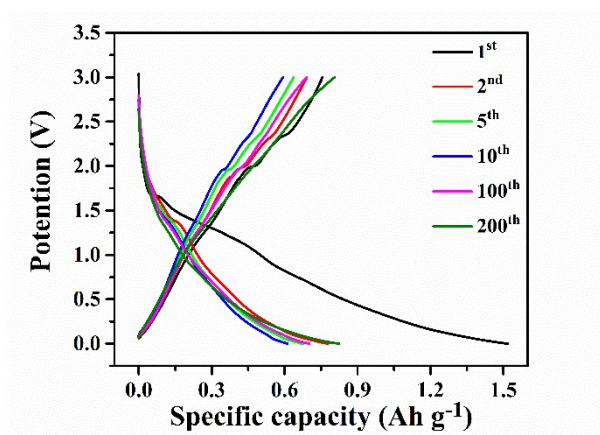

**Fig. S11.** The GCD curves of  $\text{P-WO}_{3-x}/\text{NC}$  nanowires electrode measured at  $0.1 \text{ A g}^{-1}$  for the 200 cycles.



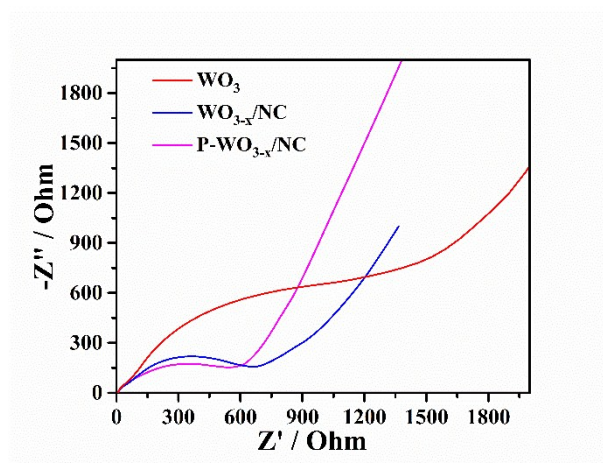

**Fig. S12.** The Nyquist plots of  $WO_3$ ,  $WO_{3-x}/NC$  and  $P-WO_{3-x}/NC$  nanowires electrodes, respectively.

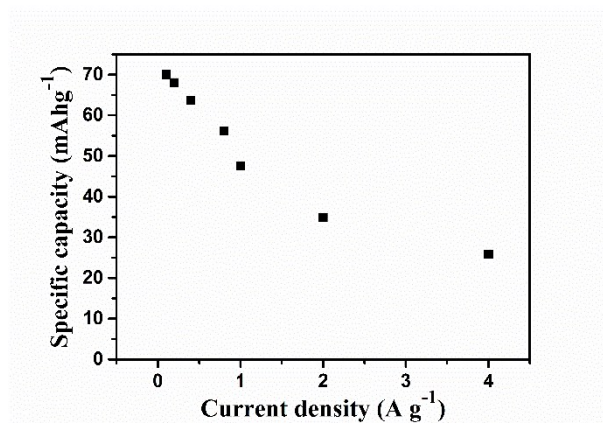

**Fig. S13.** Rate characteristic of AC cathode proceeds in the working window of 2-4.5 V at a series of current densities.

**Table S1.** Performance comparison of heterogeneous P-WO<sub>3-x</sub>/NC nanowires electrode with other WO<sub>3</sub> composite for applications in LICs and LIBs.

| Materials                                 | Current density (A g <sup>-1</sup> ) | Discharge capacity (mAh g <sup>-1</sup> ) | Capacity after (x) cycles | Capacity at high current density (mAh g <sup>-1</sup> ) after (x) cycles | Ref.      |
|-------------------------------------------|--------------------------------------|-------------------------------------------|---------------------------|--------------------------------------------------------------------------|-----------|
| WO <sub>3</sub> flowers                   | 0.05                                 | 580                                       | 470 (25)                  | 100 (0.9 A g <sup>-1</sup> )(40)                                         | [2]       |
| WO <sub>3-x</sub> /GO                     | 0.05                                 | 1500                                      | 600 (10)                  | 300 (1 A g <sup>-1</sup> )                                               | [3]       |
| WO <sub>3</sub> hollow nanospheres        | 0.14                                 | 1054                                      | 320 (100)                 | 343 (1 A g <sup>-1</sup> )                                               | [4]       |
| WO <sub>3</sub> nano-ribbons              | 0.05                                 | 816                                       | 152 (50)                  |                                                                          | [5]       |
| urchin WO <sub>3</sub> /C                 | 0.07                                 | 1229.5                                    | 508 (160)                 | 378.4 (0.7 A g <sup>-1</sup> )                                           | [6]       |
| WO <sub>3</sub> mesocrystals              | 0.05                                 | 1379                                      | 776 (10)                  | 300 (0.5 A g <sup>-1</sup> )                                             | [7]       |
| WO <sub>3</sub>                           | 0.14                                 | 1319                                      | 703 (10)                  | 400 (0.7 A g <sup>-1</sup> )                                             | [8]       |
| W <sub>18</sub> O <sub>49</sub> nanobelts | 0.1                                  | 1019.1                                    | 1284.8 (120)              | 527.8 (1 A g <sup>-1</sup> )                                             | [9]       |
| WO <sub>3-x</sub> /C nanosheets           | 0.2                                  | 1866                                      | 662 (100)                 | 200 (1 A g <sup>-1</sup> )                                               | [10]      |
| P-WO <sub>3-x</sub> /NC nanowires         | 0.1                                  | 1500                                      | 806.8 (200)               | 490 (1 A g <sup>-1</sup> )(2000)                                         | This work |

## References

- 1 W. Li, F. Xia, J. Qu, P. Li, D. H. Chen, Z. Chen, Y. Yu, Y. Lu, R. A. Caruso and W. G. Song, *Nano Research*, 2014, **7**, 903-916.
- 2 Y. Qiu, G. Xu, Q. Kuang, S. Sun and S. Yang, *Nano research*, 2012, **5**, 826-832.
- 3 F. Liua, J. G. Kima, C. W. Leea and J. S. Im, *Applied Surface Science*, 2014, **316**, 604-609.
- 4 M. Sasidharan, N. Gunawardhana, M. Yoshio and K. Nakashima, *Nano Energy*, 2012, **1**, 503-508.
- 5 C. Lian, X. Xiao, Z. Chen, Y. Liu, E. Zhao, D. Wang and C. Chen, *Nano research*, 2016, **9**, 435-441.
- 6 J. Xu, Y. Y. Li, L. Wang, Q. F. Cai, Q. Li, B. Gao, X. M. Zhang, K. F. Huo and P. K. Chu, *Nanoscale*, 2016, **8**, 16761-16768.
- 7 X. C. Duan, S. H. Xiao, L. L. Wang, H. Huang, Y. Liu, Q. H. Li and T. H. Wang,

- Nanoscale*, 2015, **7**, 2230-2234.
- 8 P. Li, X. Li, Z. Zhao, M. Wang, T. Fox, Q. Zhang and Y. Zhou, *Electrochim. Acta*, 2016, **192**, 148-157.
- 9 Y. Sun, W. Wang, J. Qin, D. Zhao, B. Mao, Y. Xiao, M. Cao, *Electrochim. Acta*, 2016, **187**, 329-339.
- 10 K. Bao, W. Mao, G. Liu, L. Ye, H. Xie, S. Ji, D. Wang, C. Chen and Y. Li, *Nano research*, 2017, **10**, 1903-1911.
